# Supplementary material for: Multifrequency multi-qubit entanglement based on plasmonic hot spots
Source: PubMed Central journal article supplement (PMC4563568; doi:10.1038/srep13941), 2015-09-09
Supplement: srep13941-s1.pdf [file srep13941-s1.pdf]

## Supplementary materials

# Multifrequency multi-qubit entanglement based on plasmonic hot spots

Jun Ren, Tong Wu, and Xiangdong Zhang

According to the Ref. S1, the matrix elements  $(Q^{pq})_{\nu\mu}^{11}$ ,  $(Q^{pq})_{\nu\mu}^{21}$ ,  $(Q^{pq})_{\nu\mu}^{12}$  and  $(Q^{pq})_{\nu\mu}^{22}$  are expressed in the following:

$$(Q^{pq})_{\nu\mu}^{11} = \frac{jk_1^2}{\pi} \int_S \{ [\mathbf{n}(\mathbf{r}') \times \mathbf{M}_\mu^q(k_2\mathbf{r}')] \cdot \mathbf{N}_\nu^p(k_1\mathbf{r}') + \sqrt{\frac{\epsilon_2}{\epsilon_1}} [\mathbf{n}(\mathbf{r}') \times \mathbf{N}_\mu^q(k_2\mathbf{r}')] \cdot \mathbf{M}_\nu^p(k_1\mathbf{r}') \} dS(\mathbf{r}') , \quad (\text{S1})$$

$$(Q^{pq})_{\nu\mu}^{12} = \frac{jk_1^2}{\pi} \int_S \{ [\mathbf{n}(\mathbf{r}') \times \mathbf{N}_\mu^q(k_2\mathbf{r}')] \cdot \mathbf{N}_\nu^p(k_1\mathbf{r}') + \sqrt{\frac{\epsilon_2}{\epsilon_1}} [\mathbf{n}(\mathbf{r}') \times \mathbf{M}_\mu^q(k_2\mathbf{r}')] \cdot \mathbf{M}_\nu^p(k_1\mathbf{r}') \} dS(\mathbf{r}') , \quad (\text{S2})$$

$$(Q^{pq})_{\nu\mu}^{21} = \frac{jk_1^2}{\pi} \int_S \{ [\mathbf{n}(\mathbf{r}') \times \mathbf{M}_\mu^q(k_2\mathbf{r}')] \cdot \mathbf{M}_\nu^p(k_1\mathbf{r}') + \sqrt{\frac{\epsilon_2}{\epsilon_1}} [\mathbf{n}(\mathbf{r}') \times \mathbf{N}_\mu^q(k_2\mathbf{r}')] \cdot \mathbf{N}_\nu^p(k_1\mathbf{r}') \} dS(\mathbf{r}') , \quad (\text{S3})$$

$$(Q^{pq})_{\nu\mu}^{22} = \frac{jk_1^2}{\pi} \int_S \{ [\mathbf{n}(\mathbf{r}') \times \mathbf{N}_\mu^q(k_2\mathbf{r}')] \cdot \mathbf{M}_\nu^p(k_1\mathbf{r}') + \sqrt{\frac{\epsilon_2}{\epsilon_1}} [\mathbf{n}(\mathbf{r}') \times \mathbf{M}_\mu^q(k_2\mathbf{r}')] \cdot \mathbf{N}_\nu^p(k_1\mathbf{r}') \} dS(\mathbf{r}') . \quad (\text{S4})$$

The line-width  $\delta$  and Rabi-frequency  $\Omega$  for the two-, three- and four-qubit cases of the systems at  $d = 1nm$  are given in the following tables:

Table 1 Two-qubit cases in Fig. 2 at  $d = 1nm$

| Peak in<br>Fig. 2(a) | $\omega$ (THz) | $\Gamma$ (THz) | $\delta$ (THz) | $\Omega$ (THz) |
|----------------------|----------------|----------------|----------------|----------------|
| 1                    | 4530           | 2540           | 111            | 751            |
| 2                    | 4800           | 3290           | 68.4           | 671            |
| 3                    | 5470           | 13500          | 57.7           | 1250           |

Table 2 Three-qubit cases in Fig. 4 at  $d = 1nm$

| Peak in<br>Fig. 4(b) | $\omega$ (THz) | $\Gamma$ (THz) | $\delta$ (THz) | $\Omega$ (THz) |
|----------------------|----------------|----------------|----------------|----------------|
| 1                    | 4460           | 2240           | 48.6           | 467            |
| 2                    | 4710           | 3300           | 134            | 940            |
| 3                    | 5440           | 8080           | 59.3           | 979            |

Table 3 Four-qubit cases in Fig. 5 at  $d = 1nm$

| Peak in<br>Fig. 5(b) | $\omega$ (THz) | $\Gamma$ (THz) | $\delta$ (THz) | $\Omega$ (THz) |
|----------------------|----------------|----------------|----------------|----------------|
| 1                    | 4540           | 3820           | 100            | 874            |
| 2                    | 4950           | 2850           | 56.2           | 566            |
| 3                    | 5440           | 10800          | 59.3           | 1130           |

## References

- [S1]. Doicu, A., Wriedt, T. & Eremin, Y. A. *Light Scattering by Systems of Particles*. (Springer-Verlag, Berlin, Heidelberg, 2006).
